# Supplementary material for: Prognostic and Predictive Relevance of Tumor-Infiltrating Lymphocytes in Squamous Cell Head–Neck Cancer Patients Treated with Radical Radiotherapy/Chemo-Radiotherapy
Source: MDPI journal article supplement (doi:10.3390/curroncol29060342), 2022-06-15
Supplement: s1 [file s1]

Article

# Prognostic and Predictive Relevance of Tumor-Infiltrating Lymphocytes in Squamous Cell Head–Neck Cancer Patients Treated with Radical Radiotherapy/Chemo-Radiotherapy

Ioannis M. Koukourakis, Anastasia G. Gkegka, Erasmia Xanthopoulou, Christos Nanos, Alexandra Giatromanolaki and Michael I. Koukourakis

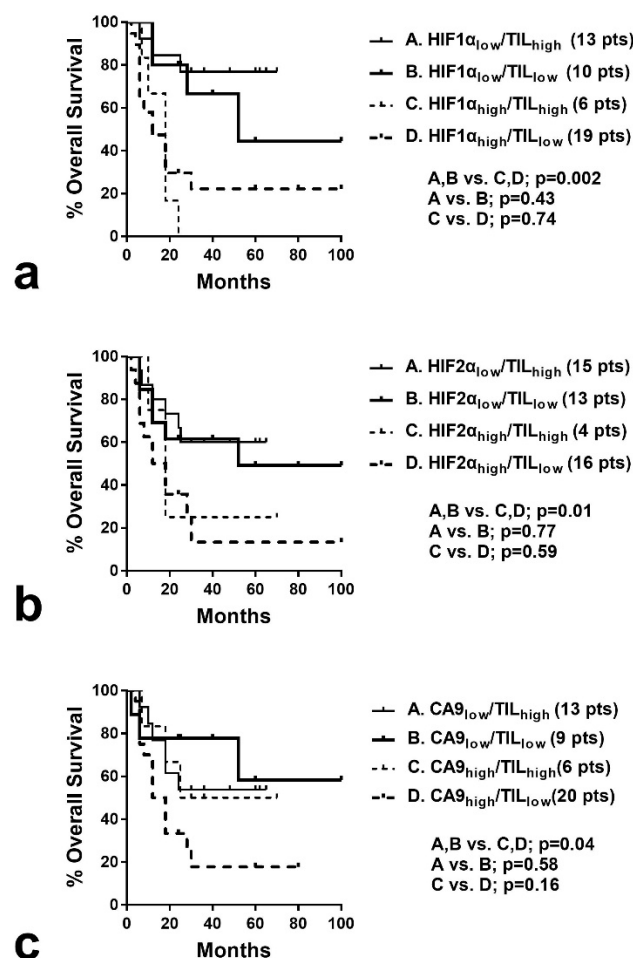

**Figure S1.** Kaplan–Meier disease-specific overall survival of 48 patients stratified for: (a) TIL density and HIF1 $\alpha$  expression, (b) TIL density and HIF2 $\alpha$  expression, and (c) TIL density and CA9 expression. (TIL = tumor infiltrating lymphocytes).
